# Supplementary material
Source: publisher figshare collection journal article supplement (https://frontiersin.figshare.com/ndownloader/files/30707231)
Supplement: Supplementary file 1 [file 30707231]

**Supplementary Table 1.** Patient characteristics

| #                | Gender<br>(F/M) | Age<br>(yrs) | HR<br>(bpm) | Disease                                               |
|------------------|-----------------|--------------|-------------|-------------------------------------------------------|
| 1                | F               | 39           | 72          | Hypertrophic cardiomyopathy                           |
| 2                | M               | 64           | 55          | Mild mitral and tricuspid regurgitation               |
| 3                | F               | 74           | 80          | Normal                                                |
| 4                | F               | 62           | 61          | Myocardial infarction                                 |
| 5                | M               | 39           | 65          | Mitral regurgitation                                  |
| 6                | M               | 67           | 65          | Non-ischemic cardiomyopathy                           |
| 7                | M               | 59           | 56          | Normal                                                |
| 8                | M               | 68           | 68          | Mitral regurgitation                                  |
| 9                | M               | 62           | 69          | Mitral regurgitation                                  |
| 10               | F               | 32           | 68          | Mild mitral regurgitation                             |
| 11               | M               | 69           | 50          | Cardiomyopathy                                        |
| 12               | F               | 30           | 63          | Mild mitral regurgitation                             |
| 13               | F               | 22           | 74          | Mild mitral and tricuspid regurgitation               |
| 14               | M               | 63           | 55          | Mitral and tricuspid regurgitation                    |
| 15               | M               | 75           | 73          | Mitral regurgitation                                  |
| 16               | M               | 55           | 55          | Mitral regurgitation                                  |
| 17               | M               | 31           | 65          | Normal                                                |
| 18               | F               | 63           | 54          | Mild mitral and tricuspid regurgitation               |
| 19               | M               | 60           | 53          | Mild mitral and tricuspid regurgitation               |
| 20               | M               | 64           | 58          | Mild mitral regurgitation                             |
| 21               | F               | 71           | 69          | Mild aortic and mitral regurgitation                  |
| 22               | F               | 72           | 55          | Aortic stenosis, mild mitral and aortic regurgitation |
| 23               | F               | 43           | 75          | Normal                                                |
| 24               | F               | 77           | 55          | Biatrial enlargement                                  |
| 25               | M               | 71           | 66          | Hypertrophic cardiomyopathy                           |
| 26               | F               | 58           | 54          | Non-obstructive hypertrophic cardiomyopathy           |
| 27               | M               | 73           | 51          | Hypertrophic cardiomyopathy                           |
| 28               | F               | 64           | 61          | Normal                                                |
| 29               | M               | 45           | 60          | Athletic cardiomyopathy                               |
| $\mu \pm \sigma$ |                 | 58±16        | 62±8        |                                                       |

\* F: female; M: male; HR: heart rate;  $\mu$ : mean;  $\sigma$ : standard deviation

**Supplementary Table 2.** Left ventricular function and structure parameters extracted from ECG-segmented and free-breathing Real-time cine images in 29 subjects.

|                   | ECG-segmented Cine | Real-time Cine     |               |
|-------------------|--------------------|--------------------|---------------|
|                   |                    | Complex-Valued-Net | Magnitude-Net |
| <b>LVEF (%)</b>   | 58.1±12.7          | 57.3±11.5          | 55.9±11.6     |
| <b>LVEDV (ml)</b> | 182.2±52.3         | 183.1±56.1         | 181.7±55.7    |
| <b>LVESV (ml)</b> | 77.8±37.5          | 80.0±36.6          | 81.4±37.1     |
| <b>LVSV (ml)</b>  | 104.5±34.5         | 103.1±32.0         | 100.3±35.1    |
| <b>LVMass (g)</b> | 114.0±39.0         | 116.3±38.9         | 115.6±39.8    |

\*LVEF: left-ventricular ejection fraction; LVEDV: left-ventricular end-diastolic volume; LVESV: left-ventricular end-systolic volume; LVSV: left-ventricular stroke volume; LVMass: left-ventricular mass.

**Supplementary Table 3.** Differences between ECG-Segmented cine and Real-time cine in quantification of left-ventricular function and structure in 29 patients

|               | Complex-Valued-Net<br>vs<br>ECG-Segmented Cine |      | Magnitude-Net<br>vs<br>ECG-Segmented Cine |      | Complex-Valued-Net<br>vs<br>Magnitude-Net |      |
|---------------|------------------------------------------------|------|-------------------------------------------|------|-------------------------------------------|------|
|               | Mean difference<br>(95% CI)                    | P    | Mean difference<br>(95% CI)               | P    | Mean difference<br>(95% CI)               | P    |
| <b>LVEF</b>   | -0.86<br>(-3.32, 1.60)                         | 0.48 | -2.26<br>(-4.19, -0.33)                   | 0.02 | 1.40<br>(-0.53, 3.33)                     | 0.15 |
| <b>LVEDV</b>  | 0.86<br>(-4.30, 6.02)                          | 0.73 | -0.55<br>(-6.45, 5.35)                    | 0.85 | 1.41<br>(-1.67, 4.49)                     | 0.36 |
| <b>LVESV</b>  | 2.25<br>(-2.49, 6.99)                          | 0.34 | 3.66<br>(-0.08, 7.39)                     | 0.05 | -1.41<br>(-4.73, 1.91)                    | 0.39 |
| <b>LVSV</b>   | -1.39<br>(-7.59, 4.81)                         | 0.65 | -4.20<br>(-10.07, 1.67)                   | 0.15 | 2.82<br>(-1.77, 7.40)                     | 0.22 |
| <b>LVMass</b> | 2.24<br>(-3.55, 8.03)                          | 0.43 | 1.57<br>(-5.28, 8.43)                     | 0.64 | 0.67<br>(-3.43, 4.77)                     | 0.74 |

\*The difference between Complex-Valued-Net/Magnitude-Net real-time cine and ECG-Segmented Cine was defined as Complex-Valued-Net/Magnitude-Net values minus ECG-Segmented Cine value. The difference between Complex-Valued-Net and Magnitude-Net was defined as Complex-Valued-Net values minus Magnitude-Net values. LVEF: left-ventricular ejection fraction; LVEDV: left-ventricular end-diastolic volume; LVESV: left-ventricular end-systolic volume; LVSV: left-ventricular stroke volume; LVMass: left-ventricular mass.

**Supplementary Table 4.** Percentage of two grade groups (1-3 and 4-5) of image quality scores in 29 patients

|                          | <b>ECG-Segmented Cine</b> |          | <b>Complex-Valued-Net</b> |          | <b>Magnitude-Net</b> |        |
|--------------------------|---------------------------|----------|---------------------------|----------|----------------------|--------|
|                          | 1-3                       | 4-5      | 1-3                       | 4-5      | 1-3                  | 4-5    |
| <b>Myocardial Edge</b>   | 6 (21%)                   | 23 (79%) | 15 (52%)                  | 14 (48%) | 29 (100%)            | 0 (0%) |
| <b>Temporal Fidelity</b> | 6 (21%)                   | 23 (79%) | 26 (89%)                  | 3 (10%)  | 29 (100%)            | 0 (0%) |
| <b>Artifact</b>          | 7 (24%)                   | 22 (76%) | 25 (86%)                  | 4 (14%)  | 29 (100%)            | 0 (0%) |

\*For myocardial edge and temporal fidelity, 1: nondiagnostic; 2: poor; 3: adequate; 4: good; 5: excellent. For artifact, 1: nondiagnostic; 2: severe; 3: moderate; 4: mild; 5: minimal.

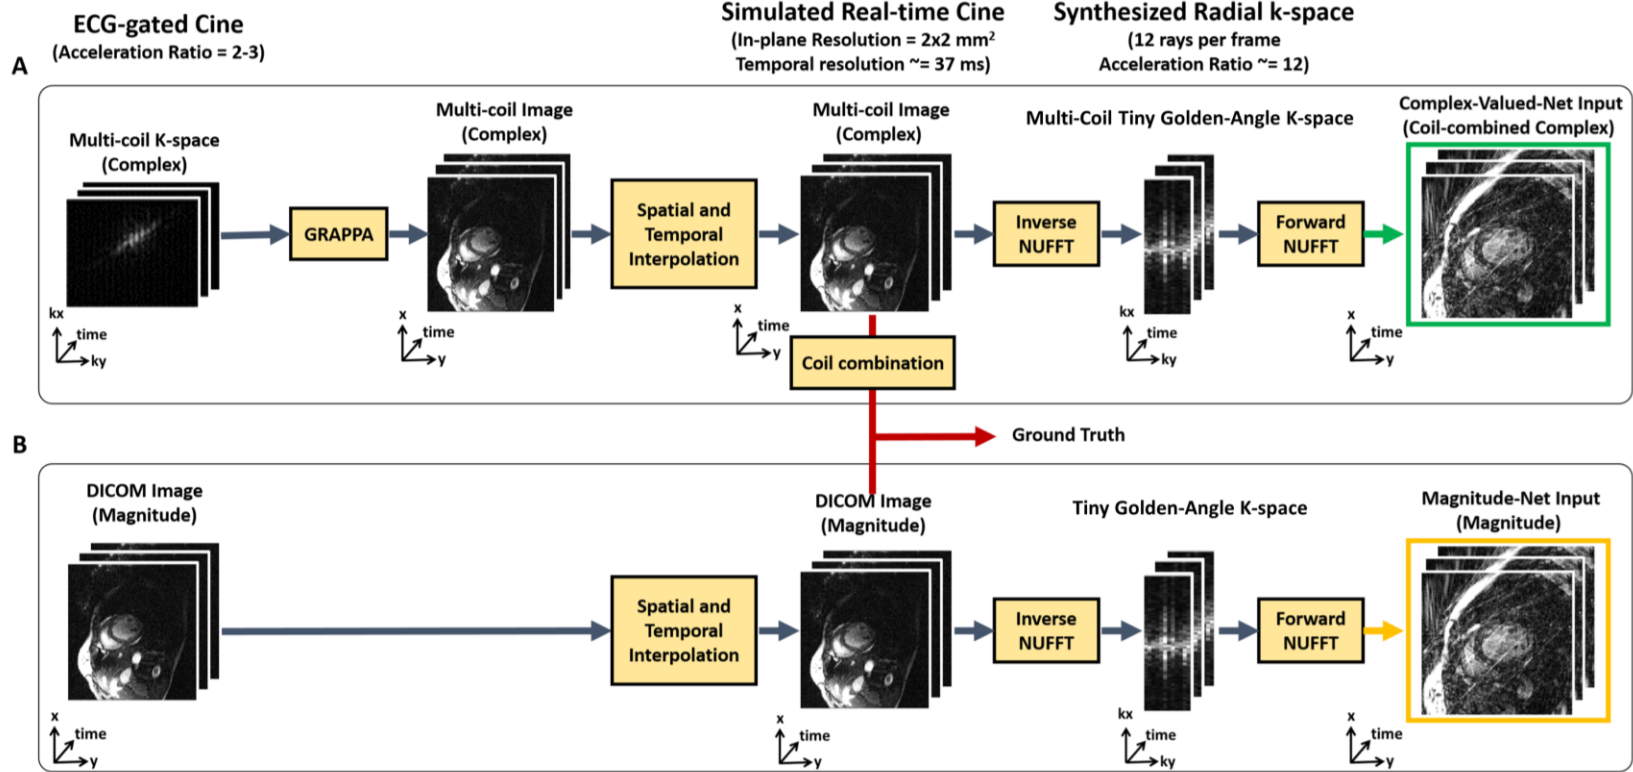

**Supplementary Figure 1.** Workflows processes for producing synthetic real-time cine datasets for Complex-Valued-Net and Magnitude-Net. **A.** The source images for Complex-Valued-Net are complex-valued, multi-coil k-space raw-data. GRAPPA was used to reconstruct accelerated (2-3 fold) complex-valued, multi-coil, ECG-gated segmented cine images. Spatial and temporal resolution for multi-coil images was interpolated to match prospectively acquired free-breathing real-time cine datasets. Inverse and forward NUFFT was used to produce multi-coil, complex-valued synthetic real-time cine images. Coil-combined, complex-valued synthetic real-time and ECG-gated segmented cine images were used as input/output pairs for Complex-Valued-Net. **B.** Source images for Magnitude-Net were DICOM images of ECG-gated segmented cine exported from the scanner. Spatial and temporal resolution for DICOM images were also interpolated to match prospectively acquired real-time cine datasets. Real-valued, synthetic real-time and ECG-gated segmented cine images generated using DICOM images were used as input/output pairs for Magnitude-Net.

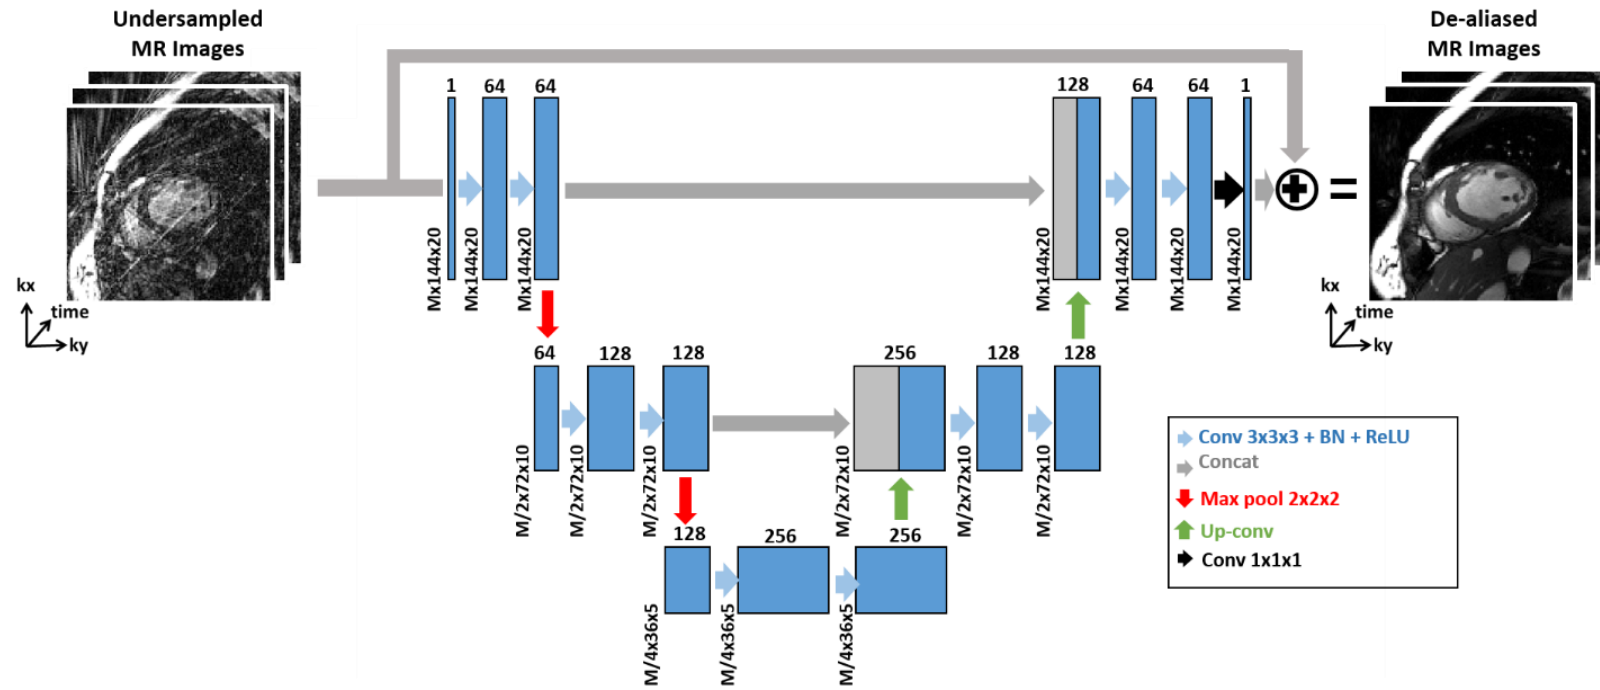

**Supplementary Figure 2.** Architecture of Complex-Valued-Net and Magnitude-Net using 3D U-net was composed of a set of  $3 \times 3 \times 3$  convolutional kernels with batch normalization (BN) and ReLU activation,  $2 \times 2 \times 2$  max pooling layers,  $2 \times 2 \times 2$  convolution transpose layers, and skip connections. For Magnitude-Net, a ReLU operator was positioned at the final layer to force the output to be non-negative.  $M$  is 144 and 288 for magnitude and complex-valued inputs, respectively.

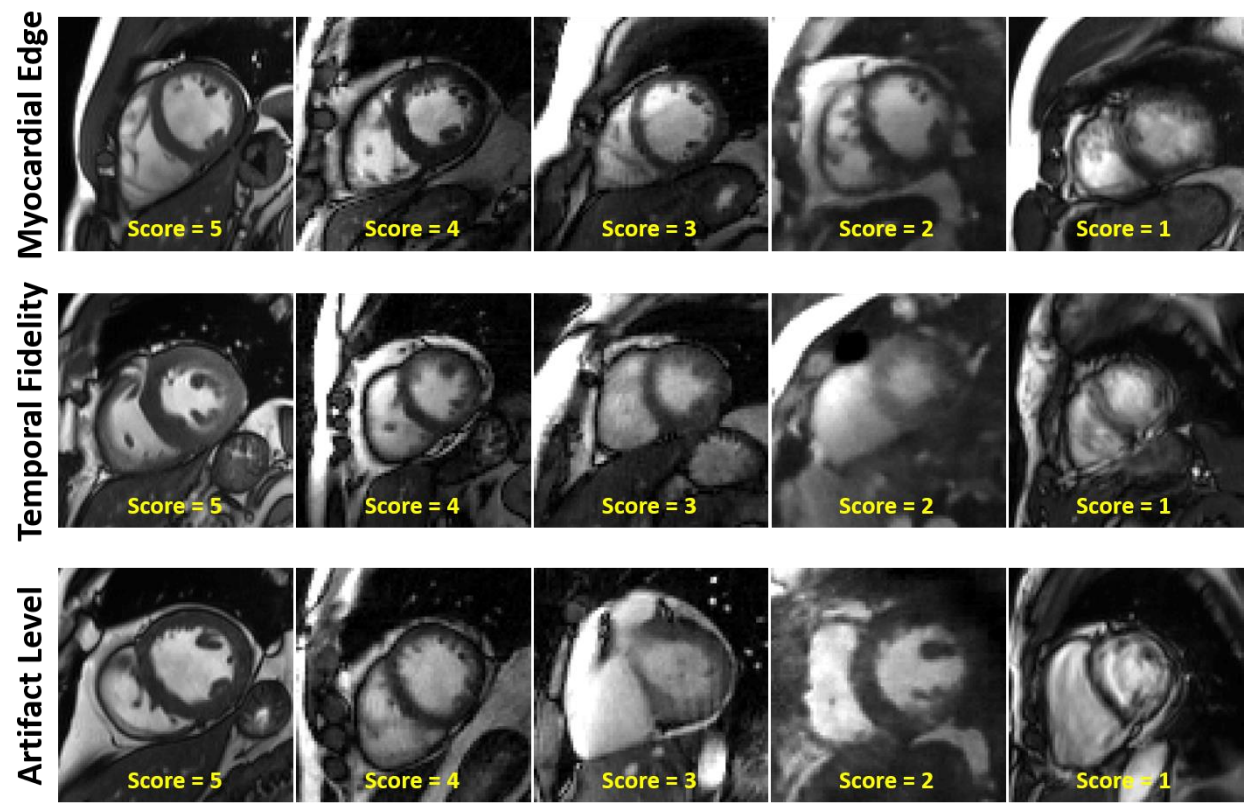

**Supplementary Figure 3.** Representative image for scoring criterion.

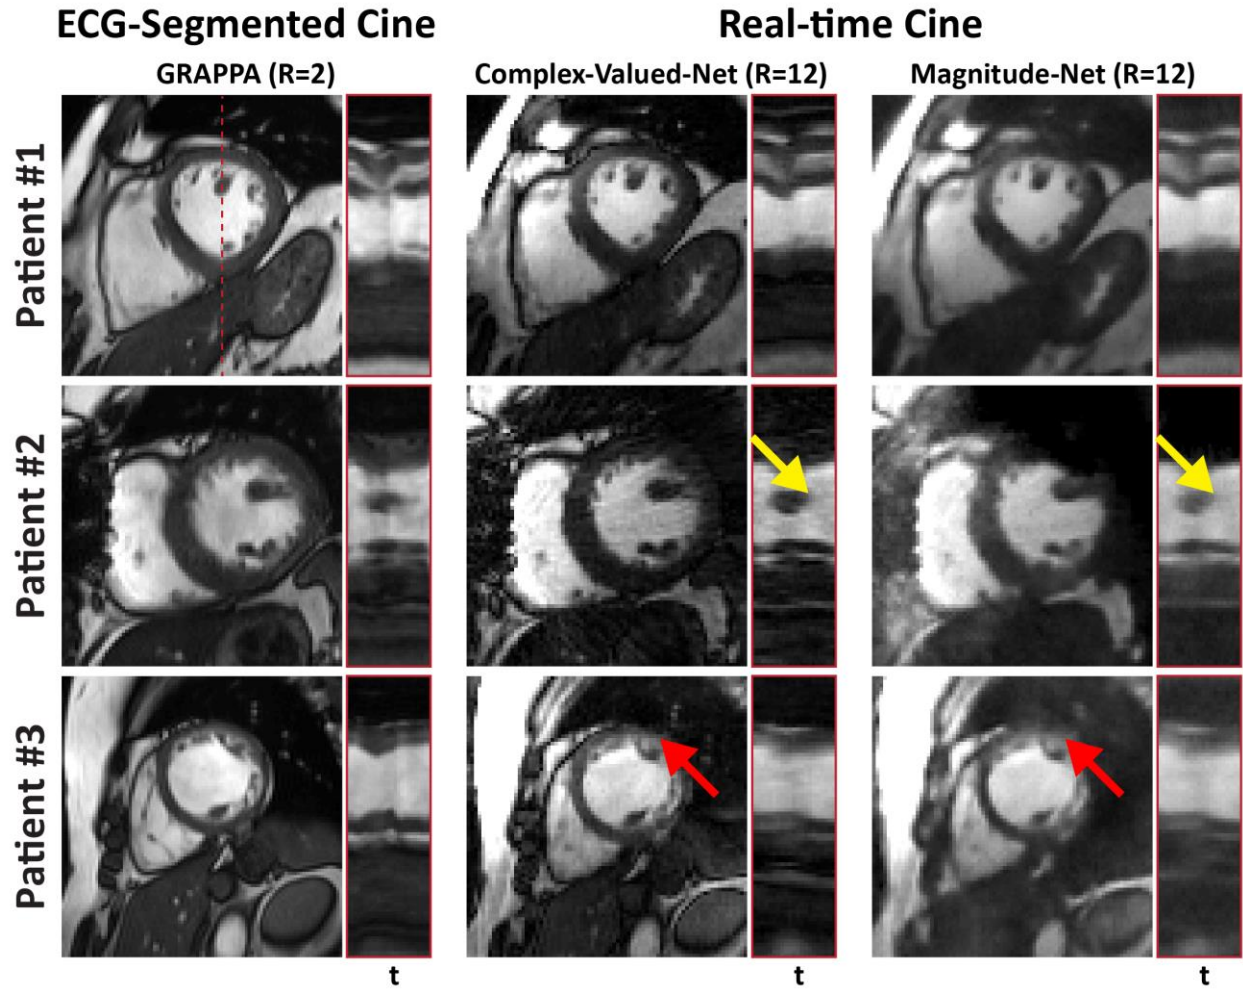

**Supplementary Figure 4.** Diastolic images from three patients using ECG-segmented Cartesian cine and real-time radial cine reconstructed by Complex-Valued-Net and Magnitude-Net. Images reconstructed by Complex-Valued-Net exhibit lower temporal blurring (yellow arrow) and less image artifact (red arrow) compared to those by Magnitude-Net.



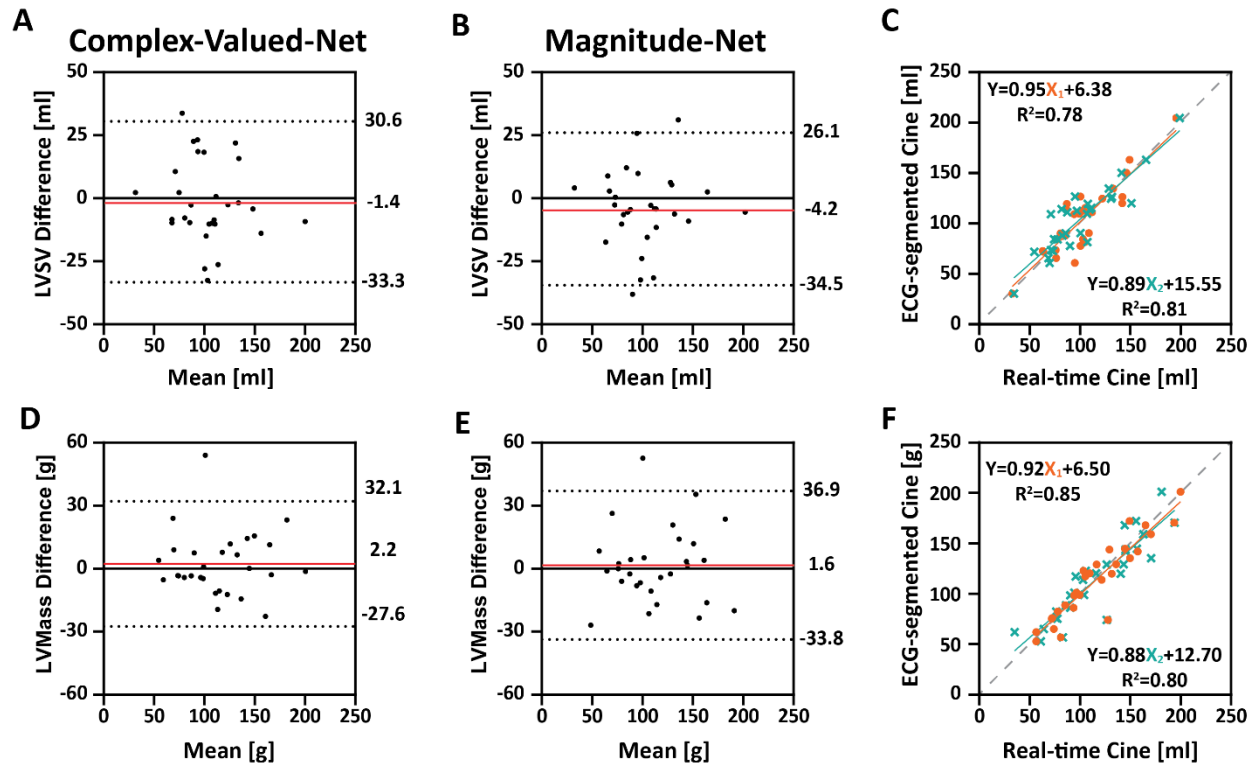

**Supplementary Figure 5.** Comparison between ECG-segmented cine and Real-time cine using two deep learning-based reconstructions (Complex-Valued-Net and Magnitude-Net) for quantification of left-ventricular stroke volume (LVS) and left-ventricular Mass (LVMass). Bland-Altman analysis shows the agreement between real-time cine reconstructed using Complex-Valued-Net (A and B) and Magnitude-Net (D and E) with ECG-segmented cine. Dotted lines indicate upper and lower 95% limits of agreement, and the red line represents the mean difference. The difference is calculated as Real-time cine (Complex-Valued-Net and Magnitude-Net) minus ECG-Segmented cine. C-F: The corresponding linear regression ( $X_1$ : Real-time cine by Complex-Valued-Net;  $X_2$ : Real-time cine by Magnitude-Net). Quantification of LVS and LVMass did not differ significantly between ECG-segmented cine and free-breathing real-time cine regardless of reconstruction by Complex-valued Net or Magnitude-Net (All  $P > 0.0167$ ).

**Supplementary Video 1:** Example movie of one patient acquired by breath-holding ECG-segmented cine.

**Supplementary Video 2:** Real-time cine reconstructed by Complex-Valued-Net from of the same subject as **Supporting Video S1**.

**Supplementary Video 3:** Real-time cine reconstructed by Magnitude-Net from the same subject as **Supporting Videos S1** and **S2**.

**Supplementary Video 4:** Real-time cine reconstructed by gridding alone from the same subject as **Supporting Videos S1, S2, and S3**.
